# Supplementary material
Source: publisher site journal article supplement (https://www.spandidos-publications.com/1786/downloadSupplementary)

Figure S1. Bioinformatics analysis predicted the interaction between VEGFR2 and PI3K/AKT/mTOR. VEGFR2, vascular endothelial growth factor receptor-2.

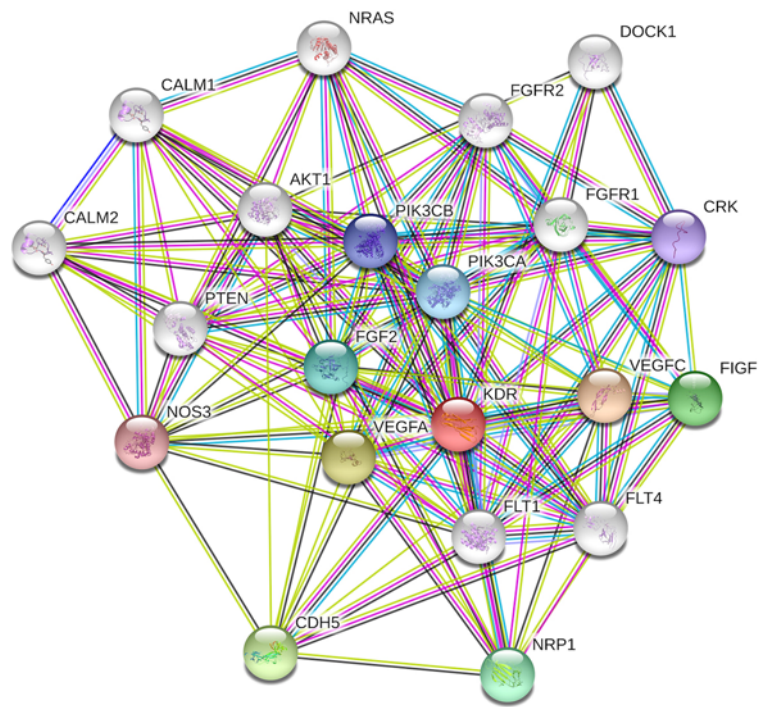

Supplement: Supplementary file 1 [file downloadSupplementary]
